# Supplementary material for: Effectiveness and Safety of Drug-Eluting Stents in Ontario
Source: Atypon-hosted journal article supplement (doi:10.1056/nejmoa071076), 2007-10-03
Supplement: nejm_tu_1393sa1.pdf [file nejm_tu_1393sa1.pdf]

## Supplementary Appendix

This appendix has been provided by the authors to give readers additional information about their work.

Supplement to: Tu JV, Bowen J, Chiu M, et al. Effectiveness and safety of drug-eluting stents in Ontario. *N Engl J Med* 2007;357:1393-402.

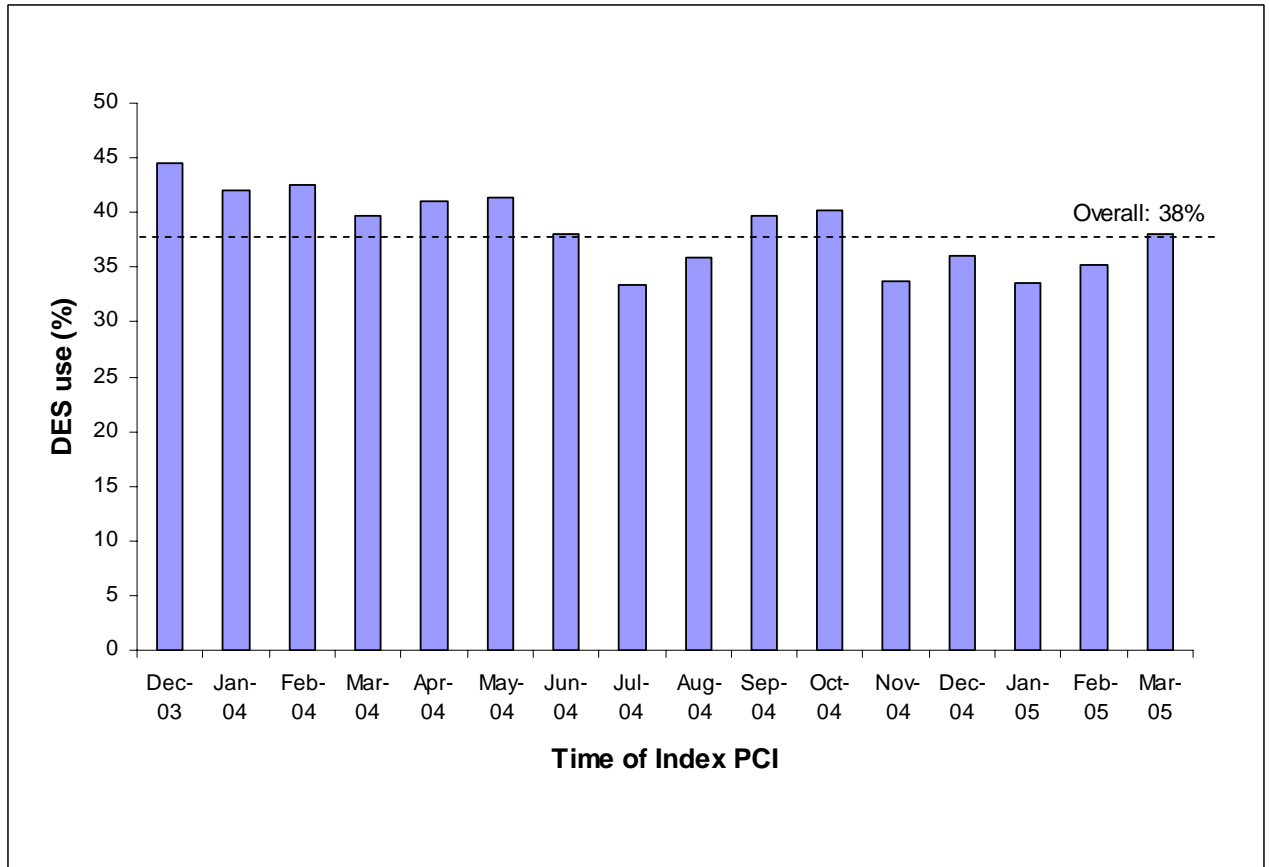

**Supplementary Appendix - Figure 1: Temporal changes in rates of drug-eluting stent (DES) use in Ontario among the unmatched percutaneous coronary intervention (PCI) cohort.**
